# Supplementary material
Source: PubMed Central journal article supplement (PMC7218682)

## GPR68 increases B cell number

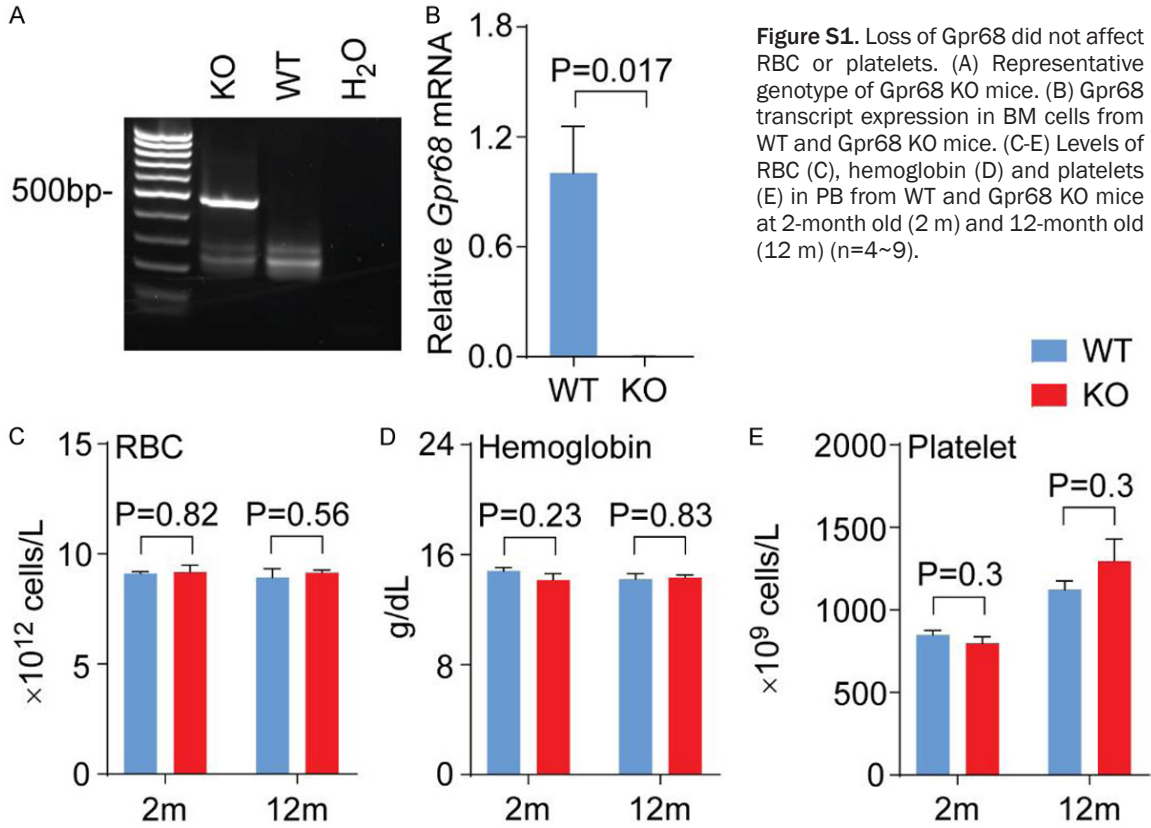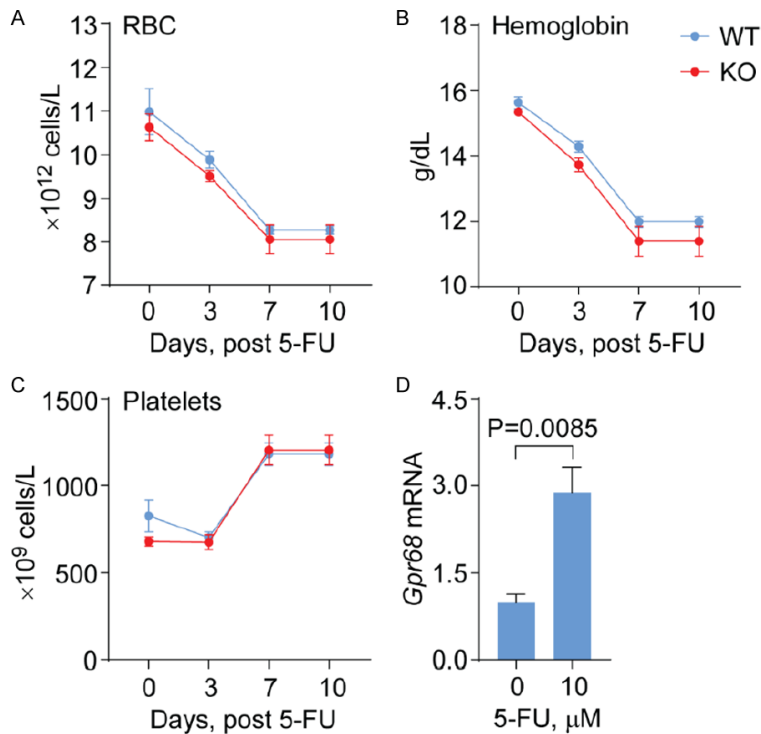

Supplement: ajbr0010-0015-f4.pdf [file ajbr0010-0015-f4.pdf]
